# Supplementary material
Source: PubMed Central journal article supplement (PMC2764557)
Supplement: NIHMS83272-supplement-Cgg_sm.pdf [file NIHMS83272-supplement-Cgg_sm.pdf]

**Supplementary material:**

**Crystal structures of the effector-binding domain of repressor CggR from *Bacillus subtilis* reveal ligand-induced structural changes upon binding of several glycolytic intermediates.**

Pavčina Řezáčová<sup>1,3,4\*</sup>, Milan Kožíšek<sup>3</sup>, Shiu F. Moy<sup>2</sup>, Irena Siegllová<sup>3,4</sup>, Andrzej Joachimiak<sup>2</sup>, Mischa Machius<sup>1</sup>, Zbyszek Otwinowski<sup>1</sup>

Table S1: Protein-ligand binding parameters

| Crystal                                          | Free  | FBP co-crystal |       | GAP/DHAP co-crystal |       | G6P co-crystal |       | F6P co-crystal |       |
|--------------------------------------------------|-------|----------------|-------|---------------------|-------|----------------|-------|----------------|-------|
|                                                  |       | DHAP           | FBP   | DHAP                | DHAP  | G6P            | G6P   | F6P            | F6P   |
| Ligand buried ASA <sup>a</sup> (Å <sup>2</sup> ) | 292.0 | 293.7          | 426.0 | 295.6               | 296.1 | 376.1          | 373.7 | 358.1          | 358.5 |
| Ligand buried ASA <sup>a</sup> (%)               | 92.8  | 93.1           | 90.1  | 93.8                | 94.3  | 96.9           | 95.8  | 92.5           | 92.6  |
| Interface protein polar atoms <sup>b</sup> (%)   | 43.3  | 43.1           | 49.0  | 44.8                | 46.4  | 41.9           | 43.4  | 42.3           | 45.2  |
| Bridging water molecules <sup>b</sup>            | 6     | 6              | 9     | 6                   | 5     | 4              | 4     | 4              | 4     |
| Gap Volume Index <sup>c</sup>                    | 0.84  | 0.84           | 1.11  | 0.79                | 0.75  | 0.49           | 0.64  | 0.53           | 0.64  |

<sup>a</sup> accessible surface area (ASA) was determined by PISA server (Krissinel & Henrick, 2005).

<sup>b</sup> determined by Protein-protein interaction server (Jones & Thornton, 1996).

<sup>c</sup> Gap volume index is defined as Gap volume / interface ASA, where gap volume is the volume of the gaps between the two interacting subunits. This parameter gives a measure of the complementarity of the interacting surfaces.

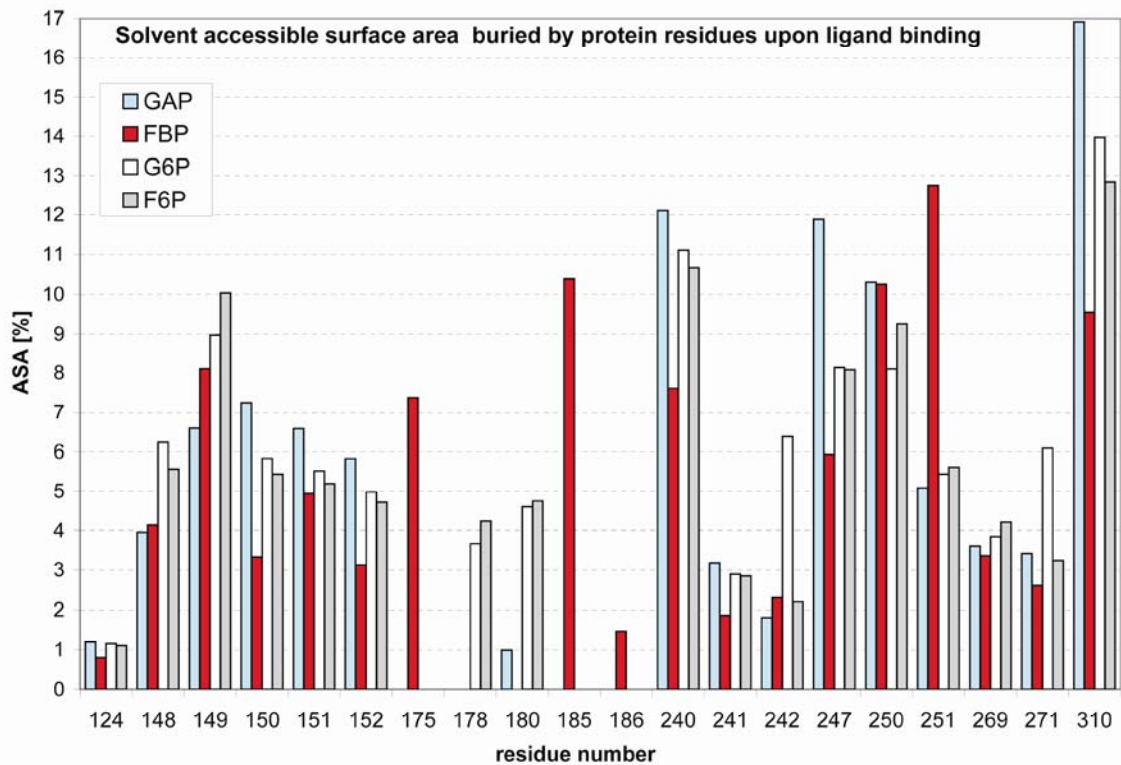

**Figure S1:** Solvent accessible surface area (ASA) buried by protein residues upon ligand binding. Determined by using Protein-protein interaction server (Jones and Thornton, 1996)

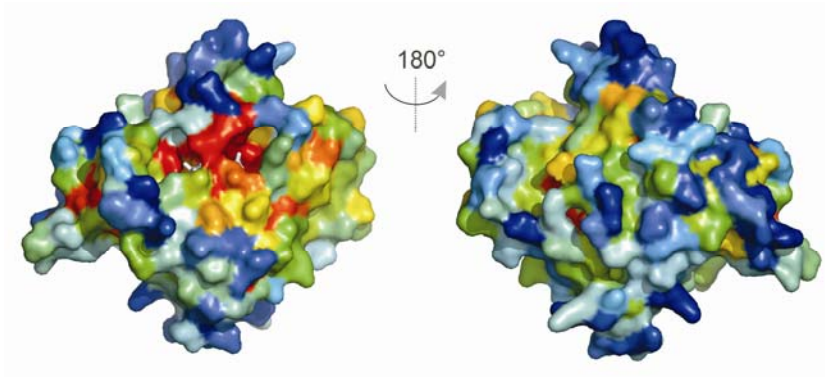

**Figure S2: Conservation of C-CggR surface residues.**

The solvent-accessible surface of the CggR effector domain colored by residue conservation in 59 closely homologous sequences. The surface is colored in rainbow colors, with blue representing a sequence identity of 10% or lower and red representing a sequence identity of over 90%. Bound FBP is shown as white sticks.

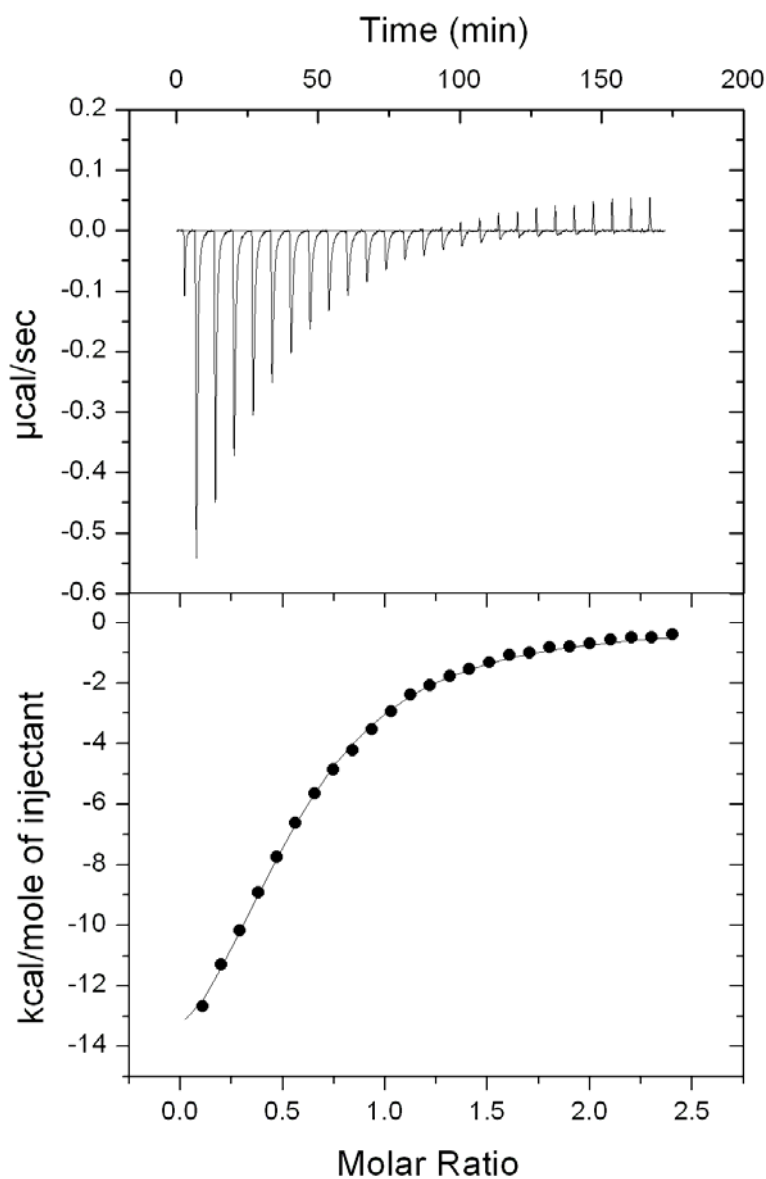

**Figure S3: Isothermal titration calorimetry (ITC) profile of FBP binding to C-CggR preloaded with DHAP (the preparation used for crystallographic studies).**

The C-CggR concentration in the cell was 18.83  $\mu\text{M}$  and the FBP concentration in the injection was 350  $\mu\text{M}$ . The fit corresponds to a single-site binding model with  $K_d = 4.26 \mu\text{M}$  and stoichiometry 0.55.

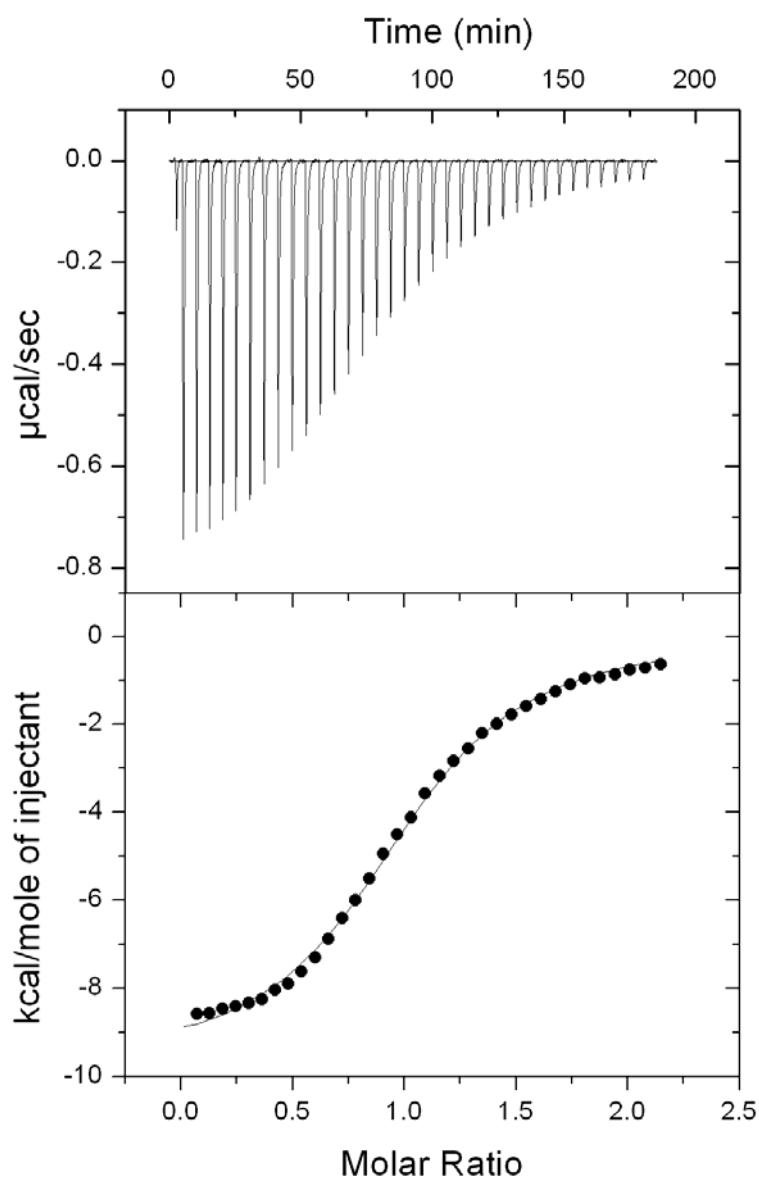

**Figure S4: ITC profile of FBP binding to C-CggR ligand-free apo-protein.**

The C-CggR concentration in the cell was 27.65  $\mu\text{M}$  and the FBP concentration in the injection was 375  $\mu\text{M}$ . The fit corresponds to a single-site binding model with average  $K_d = 2.87 \mu\text{M}$  and stoichiometry 1.05.

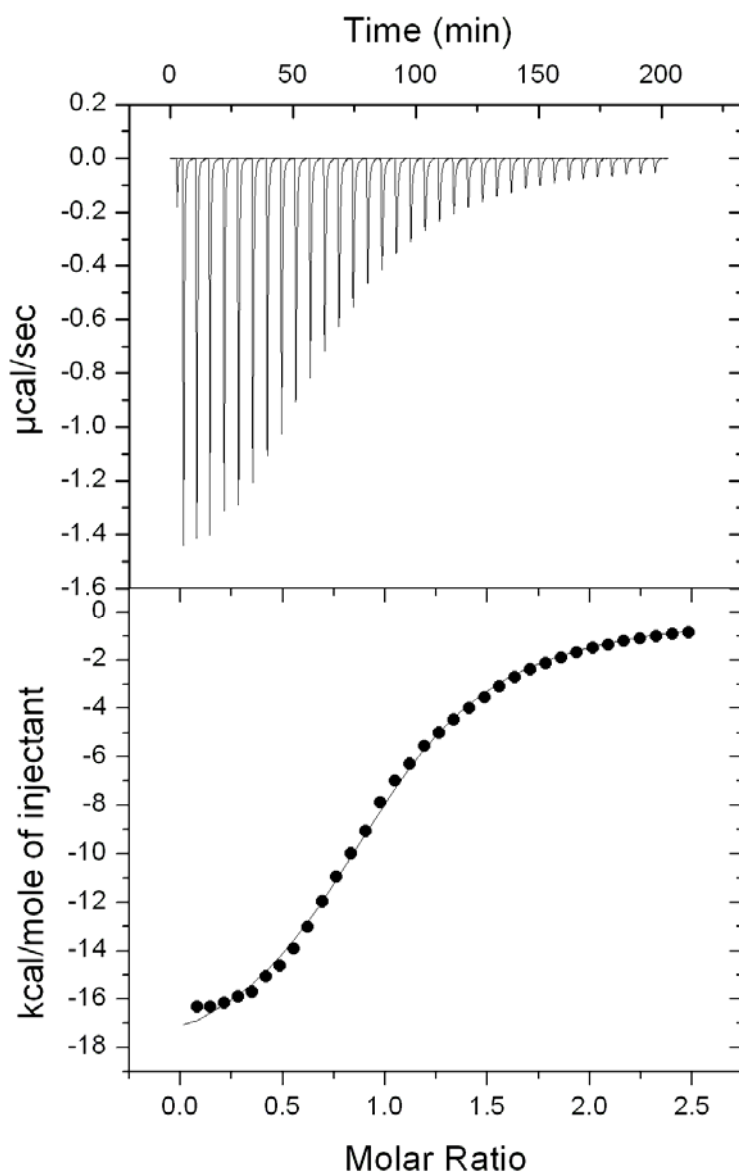

**Figure S5: ITC profile of DHAP binding to C-CggR ligand-free apo-protein.**

The C-CggR concentration in the cell was 32.63  $\mu\text{M}$  and the DHAP concentration in the injection was 360  $\mu\text{M}$ . The fit corresponds to a single-site binding model with  $K_d = 3.34 \mu\text{M}$  and stoichiometry 1.03.

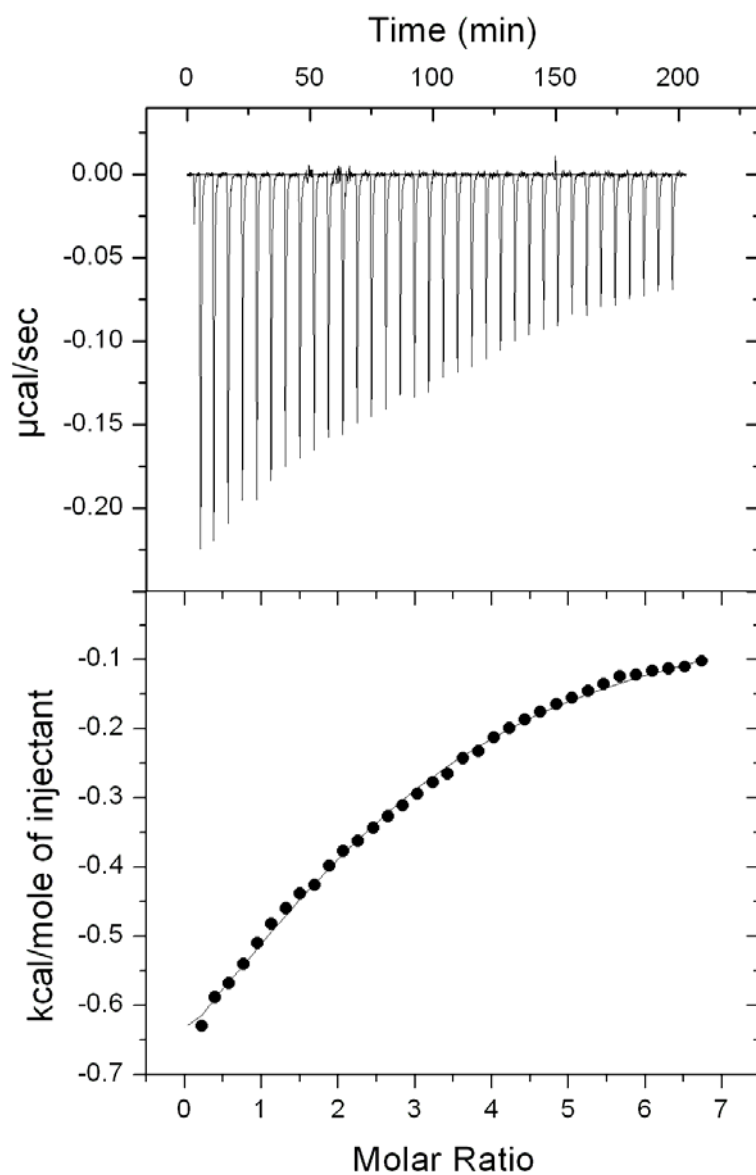

**Figure S6: ITC profile of GAP binding to C-CggR ligand-free apo-protein.**

The C-CggR concentration in the cell was 33.4  $\mu\text{M}$  and the GAP concentration in the injection was 1 mM. The fit corresponds to a single-site binding model with  $K_d = 63.3 \mu\text{M}$  and stoichiometry 2.86.

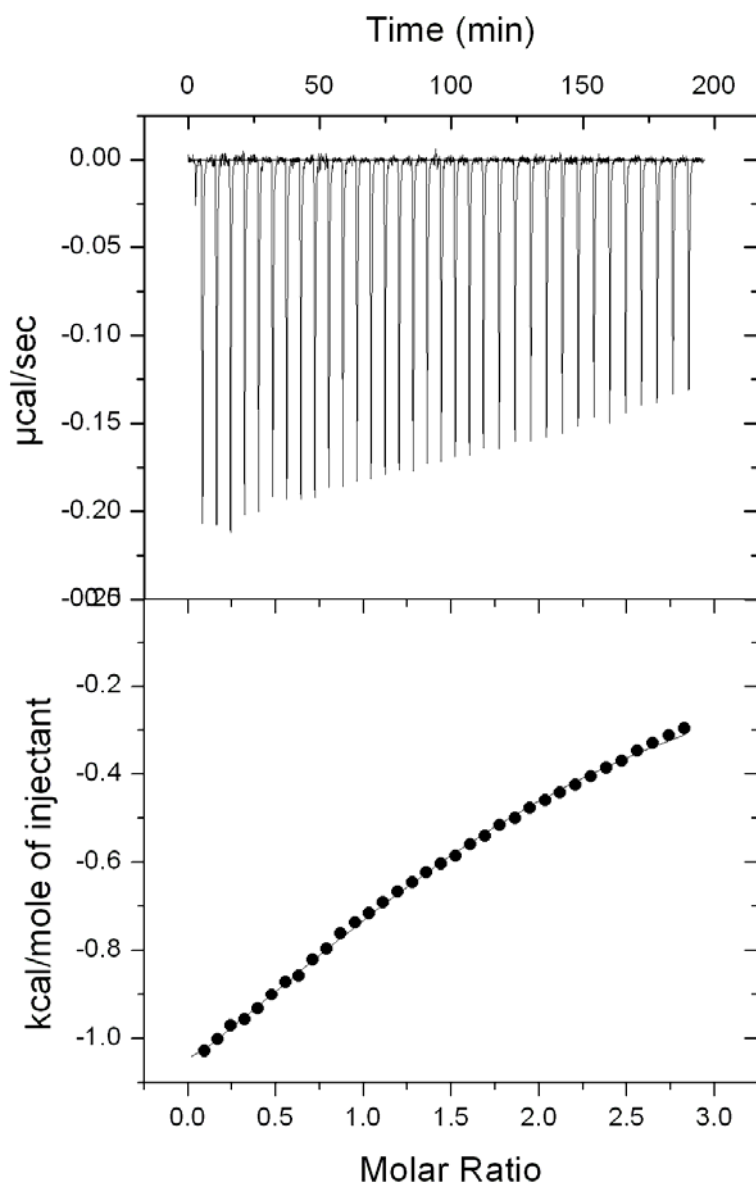

**Figure S7: ITC profile of G3P binding to C-CggR ligand-free apo-protein.**

The C-CggR concentration in the cell was  $31.2 \mu\text{M}$  and the G3P concentration in the injection was  $400 \mu\text{M}$ . The fit corresponds to a single-site binding model with  $K_d = 27.59 \mu\text{M}$  and stoichiometry 1.97.



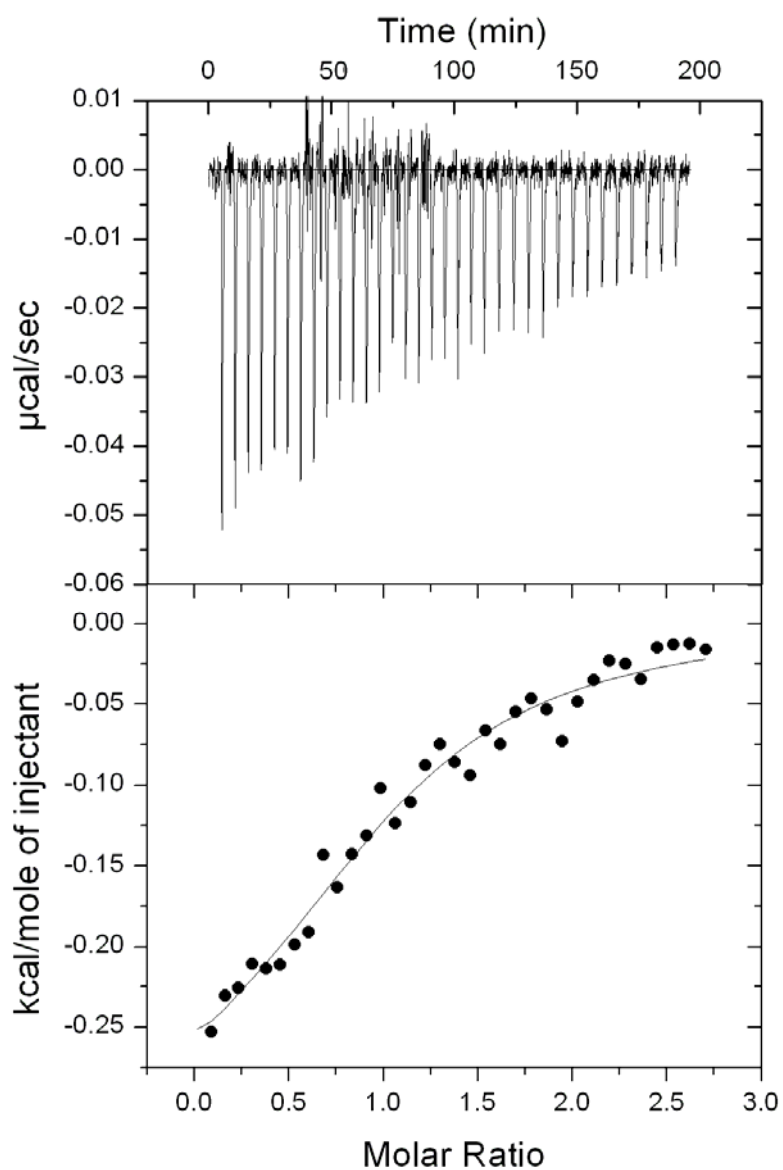

**Figure S8: ITC profile of G6P binding to C-CggR ligand-free apo-protein.**

The C-CggR concentration in the cell was 32.4  $\mu\text{M}$  and the G6P concentration in the injection was 390  $\mu\text{M}$ . The fit corresponds to a single-site binding model with  $K_d = 10.98 \mu\text{M}$  and stoichiometry 0.98.

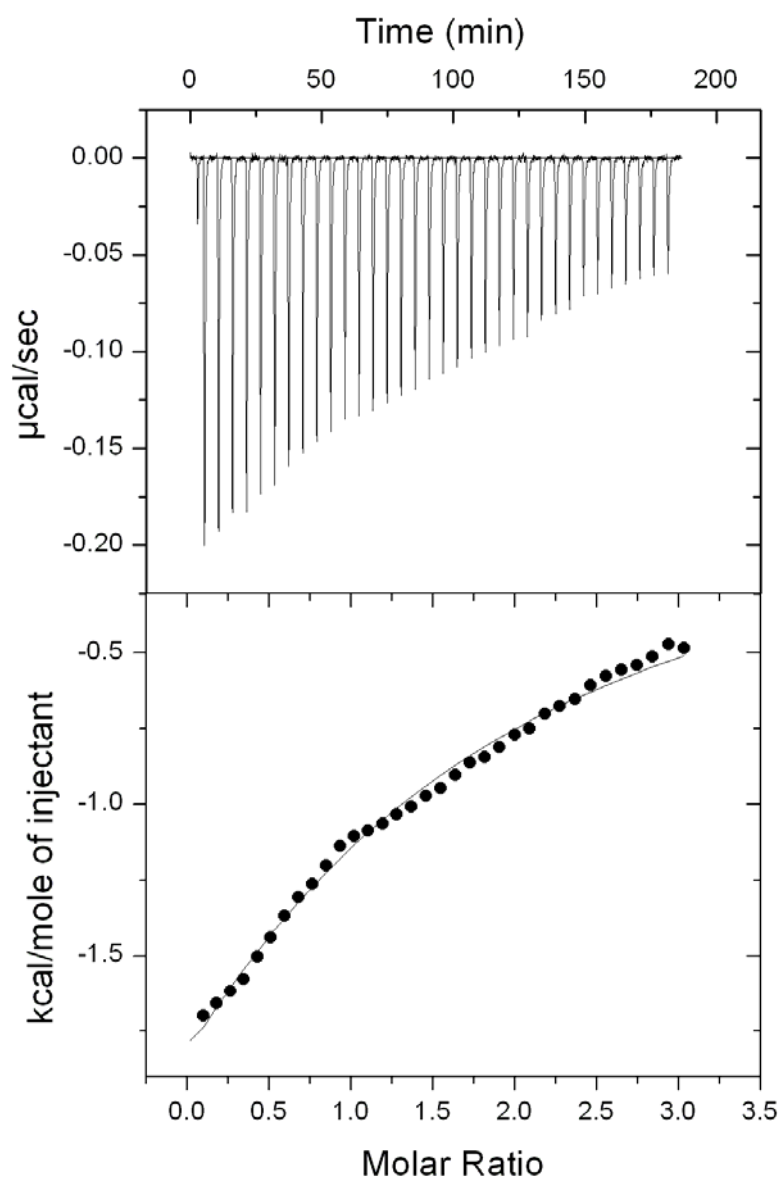

**Figure S9: ITC profile of F6P binding to C-CggR ligand-free apo-protein**

The C-CggR concentration in the cell was  $31.5 \mu\text{M}$  and the F6P concentration in the injection was  $425 \mu\text{M}$ . The fit corresponds to a single-site binding model with  $K_d = 94.3 \mu\text{M}$  and stoichiometry 0.98.

**References:**

Jones, S. & J. M. Thornton, (1996) Principles of protein-protein interactions. *Proc Natl*

*Acad Sci U S A* **93**: 13-20.

Krissinel, E. & K. Henrick, (2005 ) *Detection of Protein Assemblies in Crystals In:*

*CompLife 2005, LNBI 3695, pp. 163--174., p. 163-174. Springer-Verlag, Berlin*

*Heidelberg. .*
